# Supplementary material for: Combination of Paclitaxel and PXR Antagonist SPA70 Reverses Paclitaxel-Resistant Non-Small Cell Lung Cancer
Source: MDPI journal article supplement (doi:10.3390/cells11193094), 2022-10-01
Supplement: s1 [file s1]

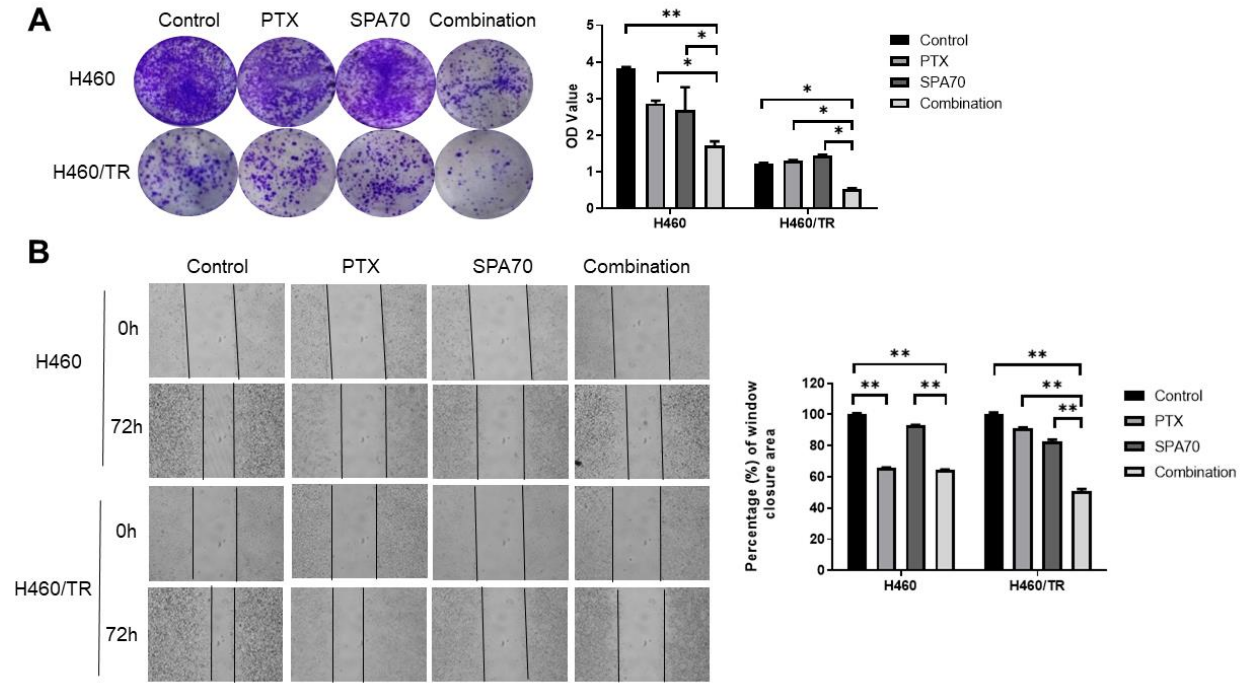

**Supplemental Figure S1.** The cell colony formation and migration, invasion effects of PTX, SPA70 and combination on H460, H460/TR cells. Experiment methods and statistical analysis as described in Figure 1. \*,  $p < 0.05$ ; \*\*,  $p < 0.01$ , compared with indicated groups. The photographs were taken by microscopy (200 $\times$ ).

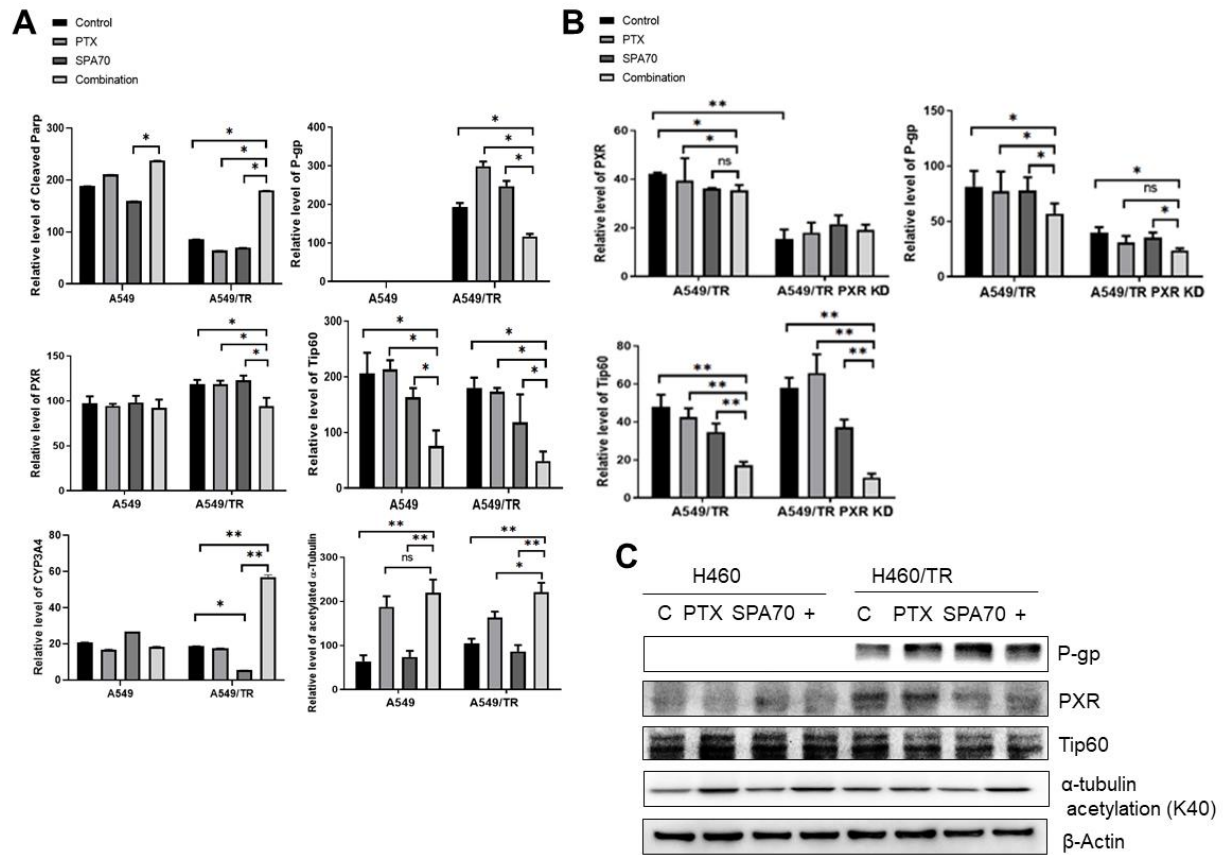

**Supplemental Figure S2.** PXR protein expression negatively correlated with Tip60 protein expression in H460 and H460/TR cells. **A**, Quantification of indicated treatment signaling pathway in parental A549 and PTX-resistant A549 cells in Figure 3. \*,  $p < 0.05$ ; \*\*,  $p < 0.01$ , compared with indicated groups. **B**, The cells were treated with 2 nM PTX, 10  $\mu$ M SPA70, or combination for 48 h ( $n = 3$ ).

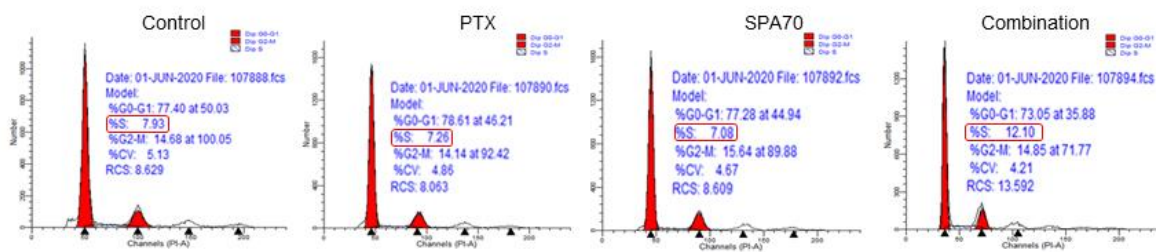

**Supplemental Figure S3.** Flow cytometry (FACS) analysis using PI staining showed combination treatment induced S phase arrest in A549/TR cells after adding 2 nM PTX, 10  $\mu$ M SPA70, or combined regimen for 48 h.

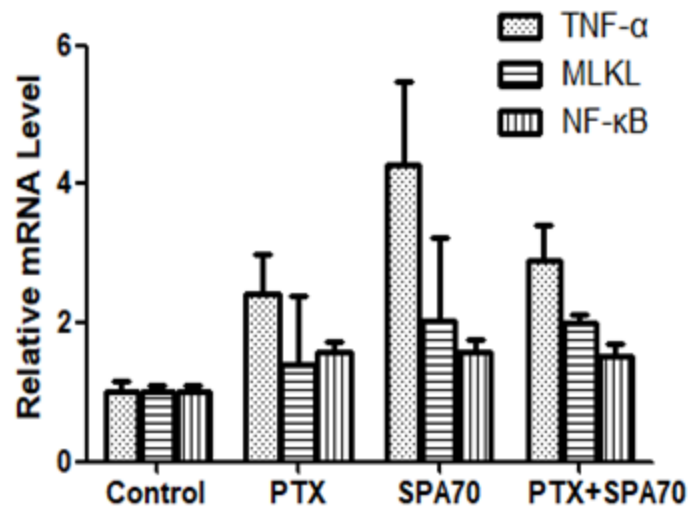

**Supplemental Figure S4.** SPA70 and combination regimen induced necroptosis and exacerbated cell death. Cells were treated with 2 nM PTX, 10  $\mu$ M SPA70, or combined regimen for 48 h. RT-PCR was applied to determine the mRNA level of TNF- $\alpha$ , MLKL and NF- $\kappa$ B expression on all treatment groups.
